# Supplementary material
Source: MDPI journal article supplement (https://www.mdpi.com/2504-477X/8/3/104)
Supplement: s1 [file s1]

## Supplementary information

**Table S1.** Summarizing information of hydrophobic antimicrobial films

| Material                                                                             | Hydrophobic properties | Antimicrobial properties                                             | Reference |
|--------------------------------------------------------------------------------------|------------------------|----------------------------------------------------------------------|-----------|
| Mesoporous titania films                                                             | No                     | Inhibition of <i>S. aureus</i> and <i>P. aeruginosa</i>              | [1]       |
| Carboxymethyl cellulose (CMC) with ZnO NPs                                           | 117 °                  | Inhibition of <i>E. coli</i>                                         | [2]       |
| Chitosan and paper-based                                                             | 110-120 °              | 98 % inhibition on <i>S. typhimurium</i> and <i>L. monocytogenes</i> | [3]       |
| Methoxy poly(ethylene glycol)-poly( $\epsilon$ -caprolactone)-chitosan (MPEG-PCL-CS) | No                     | Inhibition on <i>S. aureus</i> and <i>E. coli</i>                    | [4]       |
| PHB/PLC fibrous membrane with SiO <sub>2</sub> @TiO <sub>2</sub> NPs                 | 144 °                  | Inhibition on <i>S. aureus</i> and <i>E. coli</i>                    | [5]       |
| SiO <sub>2</sub> /SiO <sub>2</sub> -TiO <sub>2</sub>                                 | No, hydrophilicity     | No                                                                   | [6]       |
| TiO <sub>2</sub> -SiO <sub>2</sub> @PDMS                                             | 153 °                  | No                                                                   | [7]       |

**Table S2.** Contact angle measurements over glass and aluminum foil.

| Substrate     | S30                                                                                 | S40                                                                                  |
|---------------|-------------------------------------------------------------------------------------|--------------------------------------------------------------------------------------|
| Aluminum foil |  |  |

---

**Glass**

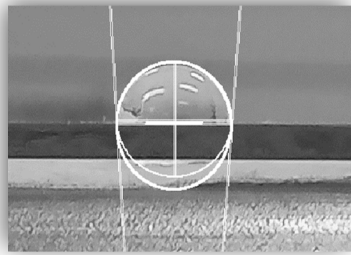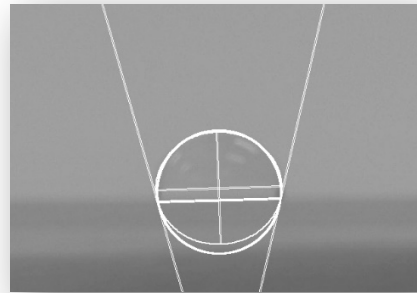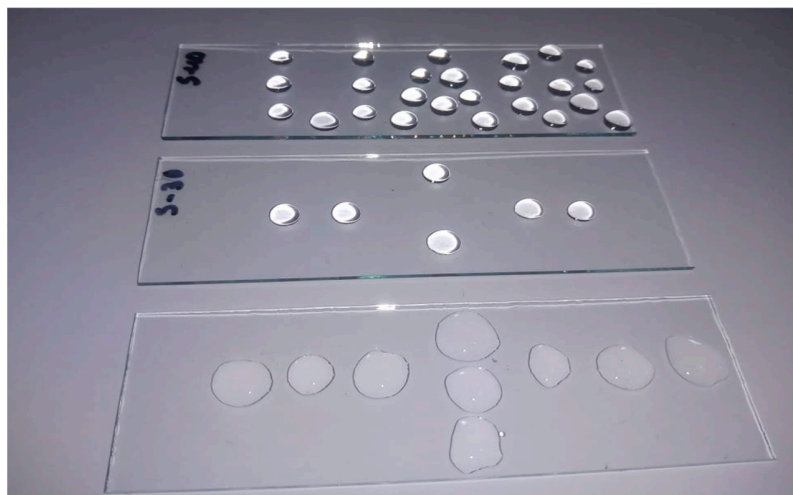

**Figure S1.** Comparison between glass uncoated and glass coated with  $\text{SiO}_2\text{-TiO}_2\text{-S30}$  and S40 films.

**Table S3.** Images of the bacterial cultures without SiO<sub>2</sub>-TiO<sub>2</sub> film (control) and SiO<sub>2</sub>-TiO<sub>2</sub>-S30 and S40.

| Cepa                 | Control                                                                             | S30                                                                                  | S40                                                                                  |
|----------------------|-------------------------------------------------------------------------------------|--------------------------------------------------------------------------------------|--------------------------------------------------------------------------------------|
| <i>E. Coli</i>       | 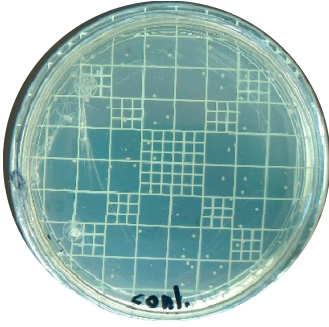   |    |   |
| <i>S. aureus</i>     |   |   |  |
| <i>P. aeruginosa</i> |  |  |                                                                                      |
| <i>P. putida</i>     |  |  |                                                                                      |

## Reference

1. Atefyekta, S.; Ercan, B.; Karlsson, J.; Taylor, E.; Chung, S.; Webster, T.J.; Andersson, M. Antimicrobial Performance of Mesoporous Titania Thin Films: Role of Pore Size, Hydrophobicity, and Antibiotic Release. *International Journal of Nanomedicine* **2016**, *11*, 977–990, doi:10.2147/IJN.S95375.
2. Ni, S.; Zhang, H.; Dai, H.; Xiao, H. Starch-Based Flexible Coating for Food Packaging Paper with Exceptional Hydrophobicity and Antimicrobial Activity. *Polymers* **2018**, *10*, 1260, doi:10.3390/polym10111260.
3. Bordenave, N.; Grelier, S.; Coma, V. Hydrophobization and Antimicrobial Activity of Chitosan and Paper-Based Packaging Material. *Biomacromolecules* **2010**, *11*, 88–96, doi:10.1021/bm9009528.
4. Wang, B.; Liu, H.; Wang, Z.; Shi, S.; Nan, K.; Xu, Q.; Ye, Z.; Chen, H. Retracted Article: A Self-Defensive Antibacterial Coating Acting through the Bacteria-Triggered Release of a Hydrophobic Antibiotic from Layer-by-Layer Films. *J. Mater. Chem. B* **2017**, *5*, 1498–1506, doi:10.1039/C6TB02614A.
5. Lin, X.; Li, S.; Jung, J.; Ma, W.; Li, L.; Ren, X.; Sun, Y.; Huang, T.-S. PHB/PCL Fibrous Membranes Modified with SiO<sub>2</sub>@TiO<sub>2</sub>-Based Core@shell Composite Nanoparticles for Hydrophobic and Antibacterial Applications. *RSC Advances* **2019**, *9*, 23071–23080, doi:10.1039/C9RA04465E.
6. Shahnooshi, M.; Eshaghi, A.; Aghaei, A.A. Transparent Anti-Fogging and Anti-Scratch SiO<sub>2</sub>/SiO<sub>2</sub>-TiO<sub>2</sub> Thin Film on Polycarbonate Substrate. *Mater. Res. Express* **2019**, *6*, 086447, doi:10.1088/2053-1591/ab2443.
7. Sazvar, A.; Alavi, S. mohammad saeed; Sarpoolaky, H. Effect of Chemical Composition on Microstructure and Hydrophobic Properties of SiO<sub>2</sub>-TiO<sub>2</sub>@PDMS Coating. *Iranian Journal of Materials Science and Engineering* **2023**, *20*, 1–11, doi:10.22068/ijmse.3114.
